# Supplementary material for: Local Inhibition of MicroRNA-24 Improves Reparative Angiogenesis and Left Ventricle Remodeling and Function in Mice With Myocardial Infarction
Source: PubMed Central journal article supplement — Mol Ther. 2013 Jun 18;21(7):1390–402. doi: 10.1038/mt.2013.89 (PMC3702112; doi:10.1038/mt.2013.89), 2013-06-18
Supplement: mt201389x1.pdf [file mt201389x1.pdf]

## Supplementary material

| <i>Gene</i> | <i>Primers sequences</i>                                      |
|-------------|---------------------------------------------------------------|
| Mouse GATA2 | 5`-CACCCGCGTATTGAATG-3`<br>5`-CCTGCGAGTCGAGATGGTTG-3`         |
| Mouse PAK4  | 5`-GCTCCAACCTCCCTACGCAG-3`<br>5`-TGGACCATCCCTCGAAGATTT-3`     |
| Mouse BIM   | 5`-CGACAGTCTCAGGAGGAACC-3`<br>5`-CCTTCTCCATACCAGACGGA-3`      |
| Mouse eNOS  | 5`-TCAGCCATCACAGTGTCCC-3`<br>5`-ATAGCCCGCATAGCGTATCAG-3`      |
| Human GATA2 | 5`-GCAACCCCTACTATGCCAACC-3`<br>5`-CAGTGGCGTCTTGGAGAAG-3`      |
| Human PAK4  | 5`-GGACATCAAGAGCGACTCGAT-3`<br>5`-CGACCAGCGACTTCCTTCG-3`      |
| Human BIM   | 5`-TAAGTTCTGAGTGTGACCGAGA-3`<br>5`-GCTCTGTCTGTAGGGAG GTAGG-3` |
| Human eNOS  | 5`-TAGGTCTTGGGTTGTCAGG-3`<br>5`-TGCTGGCATA CAGGACTCAG-3`      |
| 18S         | 5`-TAGAGGGACAAGTGGCGTTC-3`<br>5`-TGTACAAAGGGCAGGGACTT-3`      |

**Table S1.** Mouse and human PCR primer sequences.

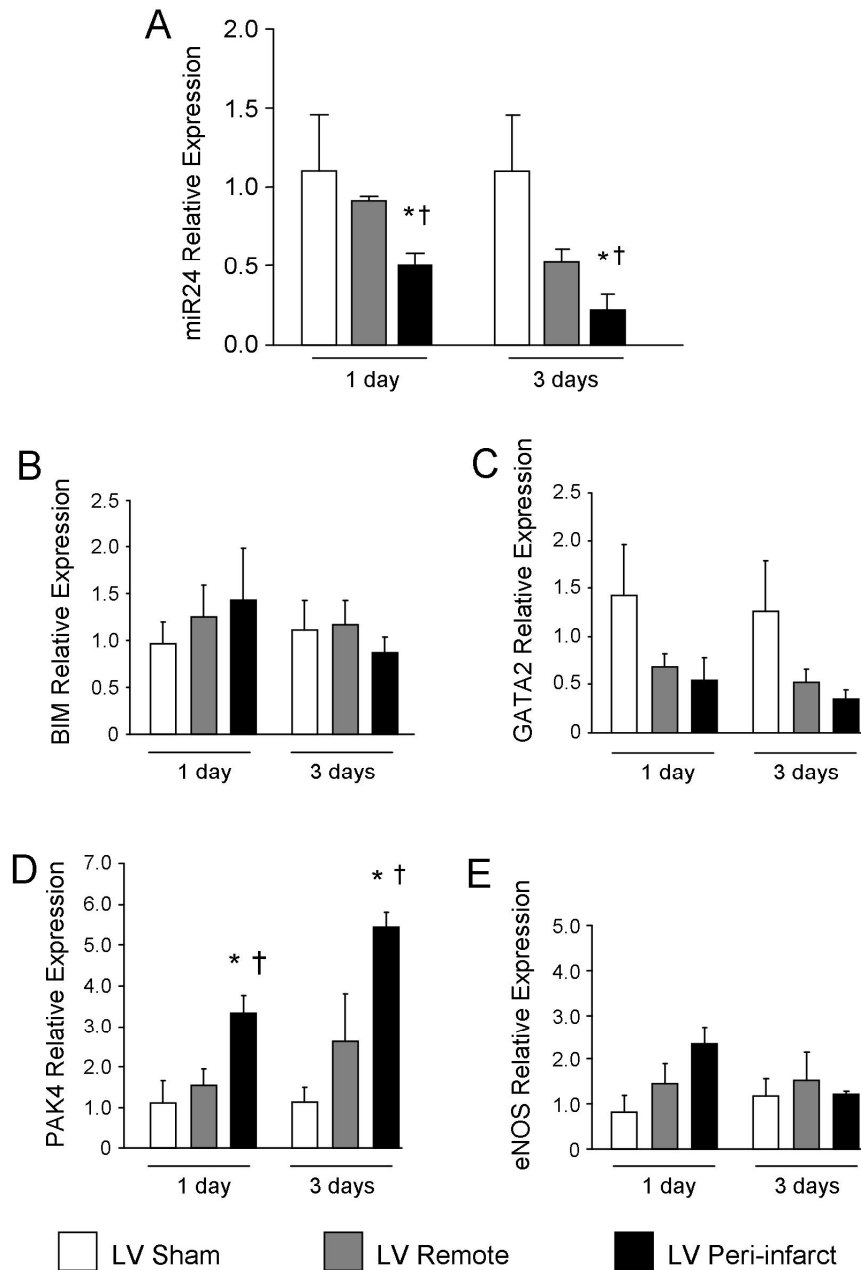

**Figure S1. microRNA-24 (miR-24) and target genes expression in the mouse peri-infarct myocardium.** Relative expression of miR-24 (A) and its target genes BIM (B), GATA2 (C), PAK4 (D) and eNOS (E) evaluated in cardiac regions isolated at 1 and 3 days after MI or sham operation. Data are expressed as mean±SEM. N=3-4/group. \*p<0.05 vs. LV/Sham; †p<0.05 vs. LV remote area.

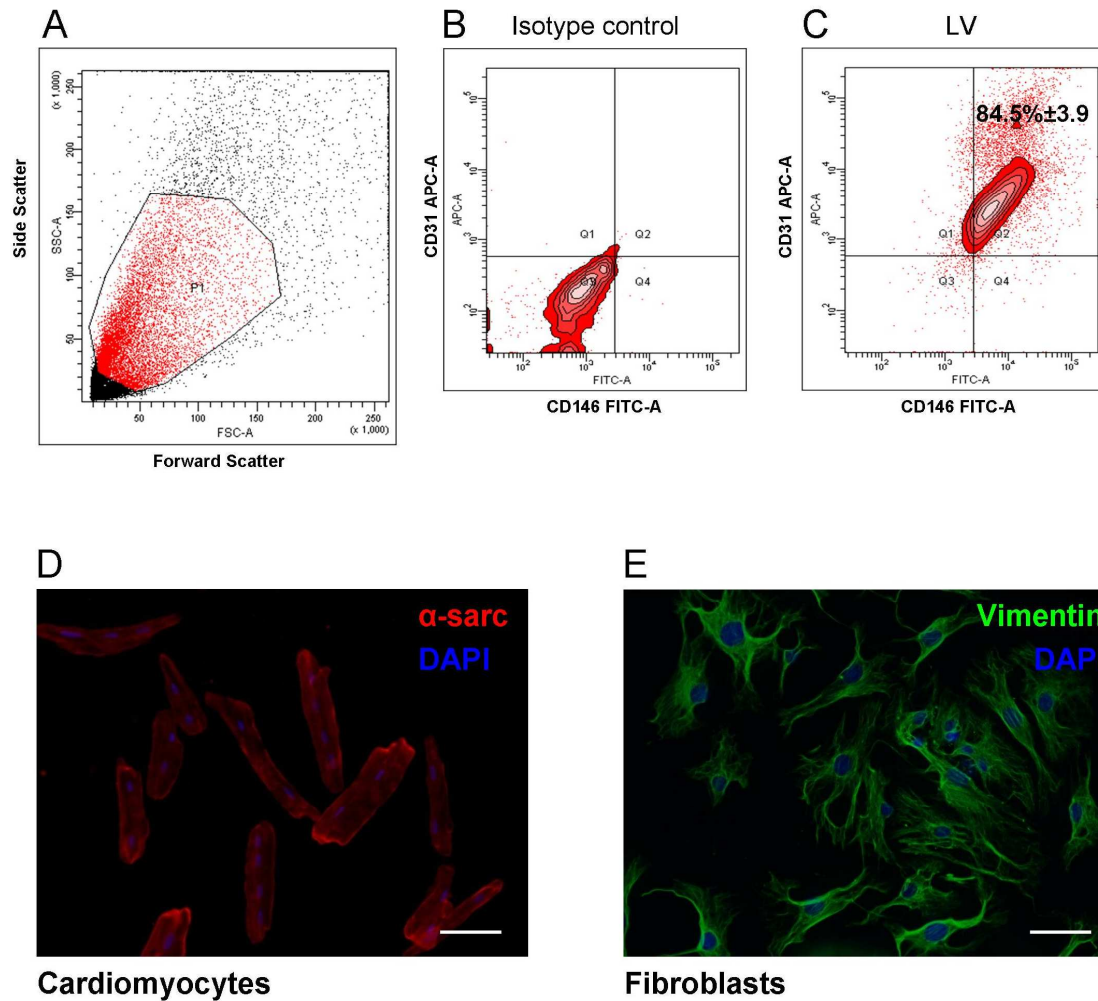

**Figure S2. Characterization of cells isolated from the mouse LV.** (A-C) Flow cytometric analysis of CD146+ ECs. (A) Forward and side scatter show the total population (in red). (B) Isotype control for CD146+/CD31+ cells. (C) Percentage of double positive CD146/CD31 cells. (N=2 pools of cells coming from a total of 4 LVs). (D) Isolated adult cardiomyocytes after staining for  $\alpha$ -sarcomeric actin (in red). Nuclei are counterstained with DAPI (blue). Size bar: 20 $\mu$ m. (E) Isolated fibroblasts after staining for vimentin (in green). Nuclei are depicted in blue (DAPI). Size bar: 20 $\mu$ m.

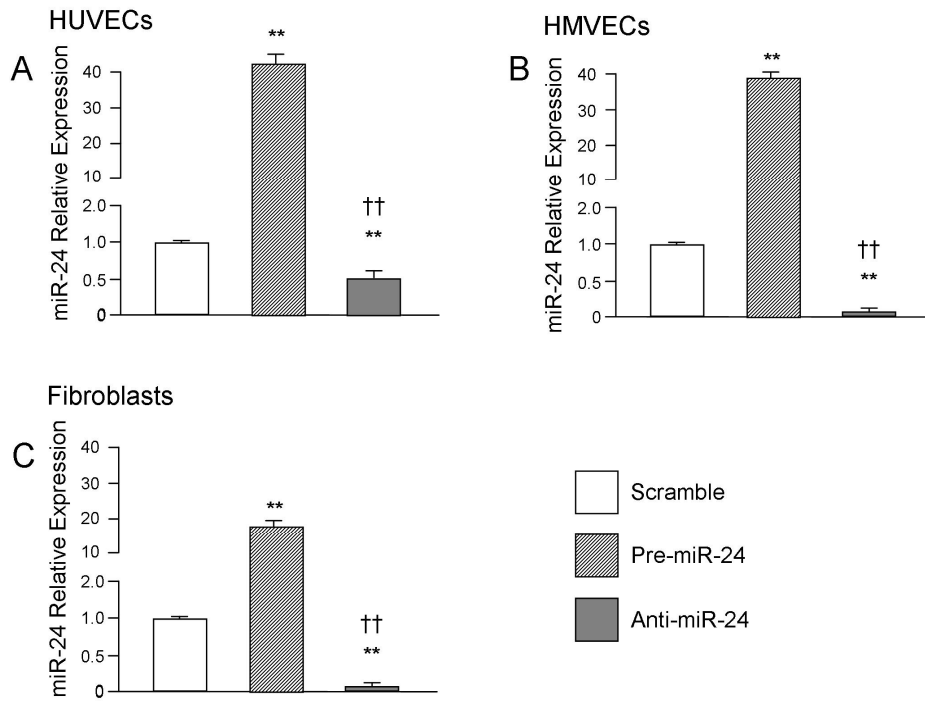

**Figure S3. miR-24 relative expression in cultured cells after transfection.** miR-24 relative expression in HUVECs (A), HMVECs (B) and mouse cardiac fibroblasts (C) after transfection with pre-miR-24, anti-miR-24, or a negative control (scramble) (each at 50  $\mu$ M). Small nuclear RNA U6 (snU6) was used for normalization and data are reported to the control group by the 2-ddCt formula. Data are expressed as mean $\pm$ SEM. N= 2-3/group. \*\*p<0.01 vs. Scramble; ††p<0.01 vs. Pre-miR-24.

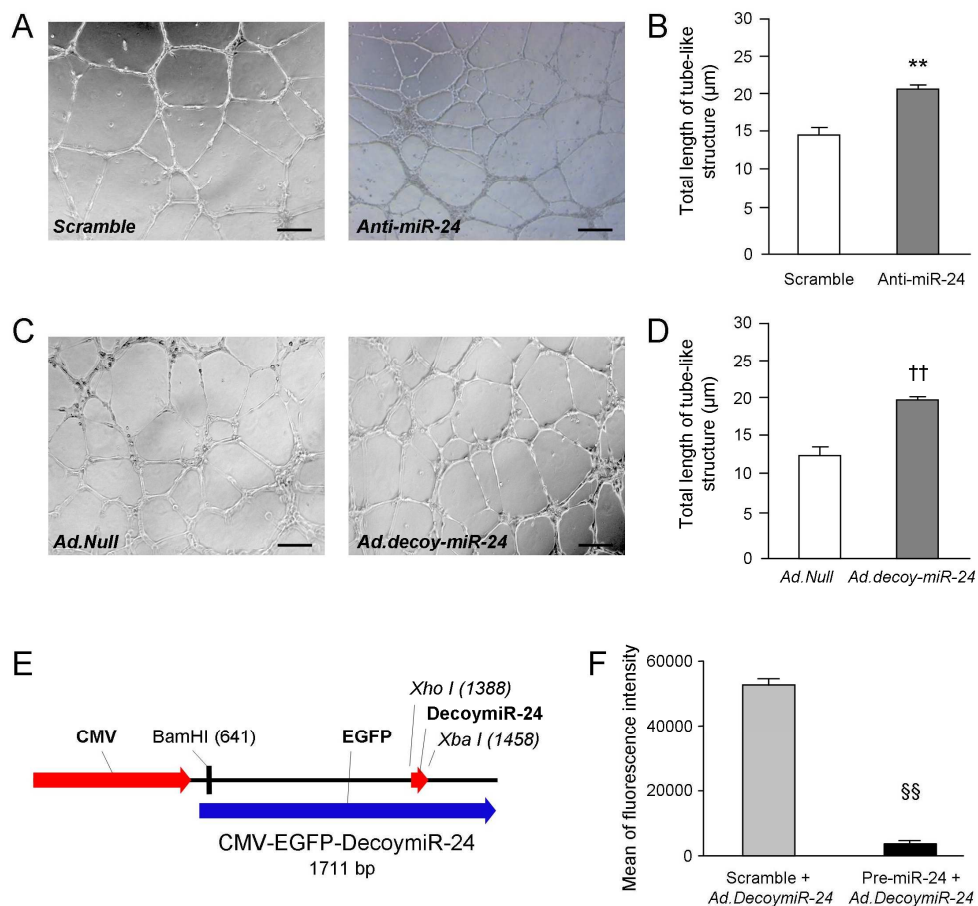

**Figure S4. Proangiogenic effect miR-24 inhibition in HUVECs and presentation of the decoy-miR-24.** 2D Matrigel assay on HUVECs transfected with Anti-miR-24 or control (Scramble) (A-B) and on HUVECs infected with *Ad.decoymiR-24* or control (*Ad.Null*) (C-D). Photomicrograph show the endothelial network formation (scale bar 20μm) at 5 hours after seeding the infected cells on Matrigel. Bar graphs show total length of tube-like structures. (E) Schematic description of the functional elements in the 3'UTR decoymiR-24 vector. CMV: cytomegalovirus immediate early promoter; eGFP: enhanced green fluorescent protein. (F) Relative mean fluorescence (measured by fluorometry) of HEK293 cells infected with decoy-miR-24 vector together with pre-miR-24 or scrambled oligos (Scramble). Data are expressed as means±SEM. (N=3/group) \*\*p<0.01 vs. Scramble; ††p<0.01 vs. *Ad.Null*; §§p<0.01 vs. Scramble+*Ad.decoymiR-24*.

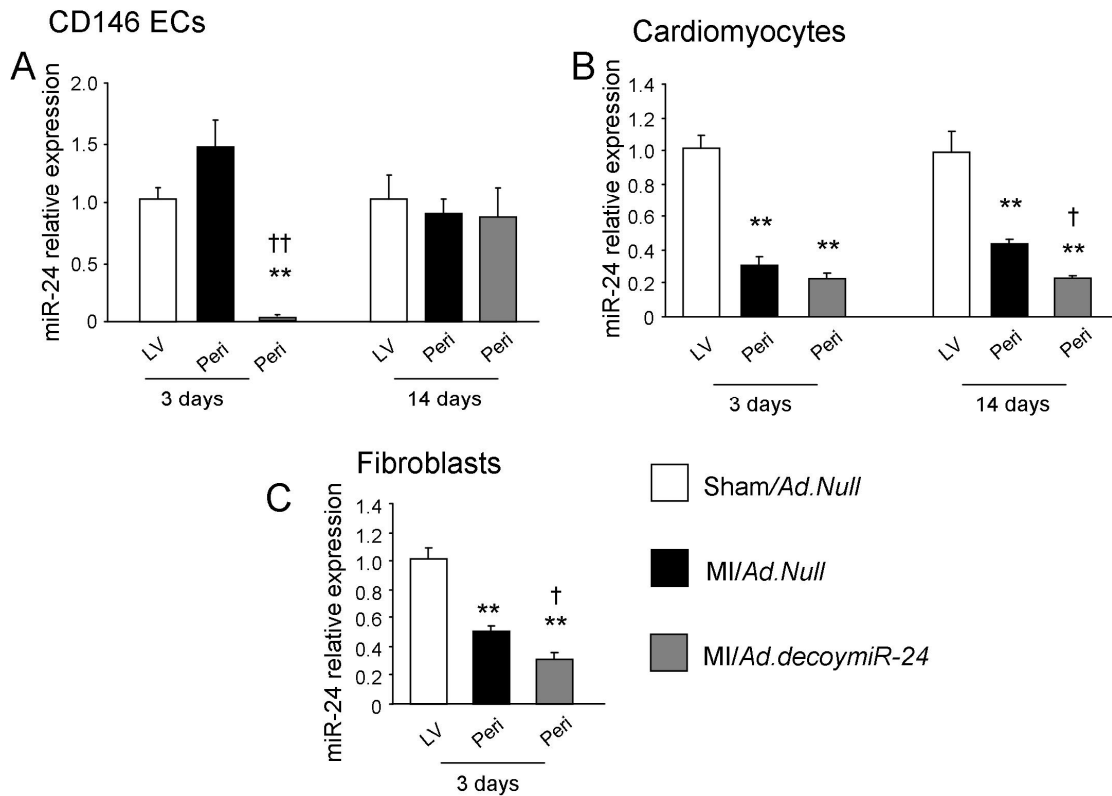

**Figure S5. miR-24 expression on cells isolated from the mouse LV after MI and *Ad.decoy*-mediated miR-24 inhibition.** miR-24 relative expression on CD146+ ECs (A), cardiomyocytes (B) and cardiac fibroblasts (C) at 3 and 14 days post-MI and gene transfer. Data are expressed as mean±SEM. Cells were combined in pools of 2 samples. N=3-4 pools/group. \*\*p<0.01 vs. Sham/Ad.Null; ††p<0.01 and †p<0.05 vs MI/Ad.Null.

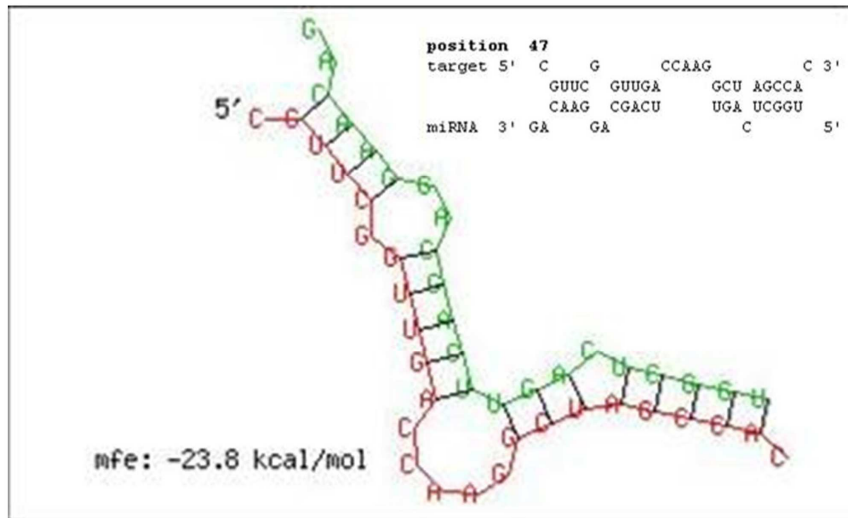

**Figure S6.** Alignment of human mature miR-24 (red sequence) on mouse eNOS 3'-UTR (green sequence) using RNAhybrid software.
